# Supplementary material for: SPTBN1 suppresses the progression of epithelial ovarian cancer via SOCS3-mediated blockade of the JAK/STAT3 signaling pathway
Source: publisher site journal article supplement (doi:10.18632/aging.103303), 2020-06-08
Supplement: Supplementary file [file aging-v12i11-103303-supplementary-material-SD1.pdf]

SUPPLEMENTARY FIGURES

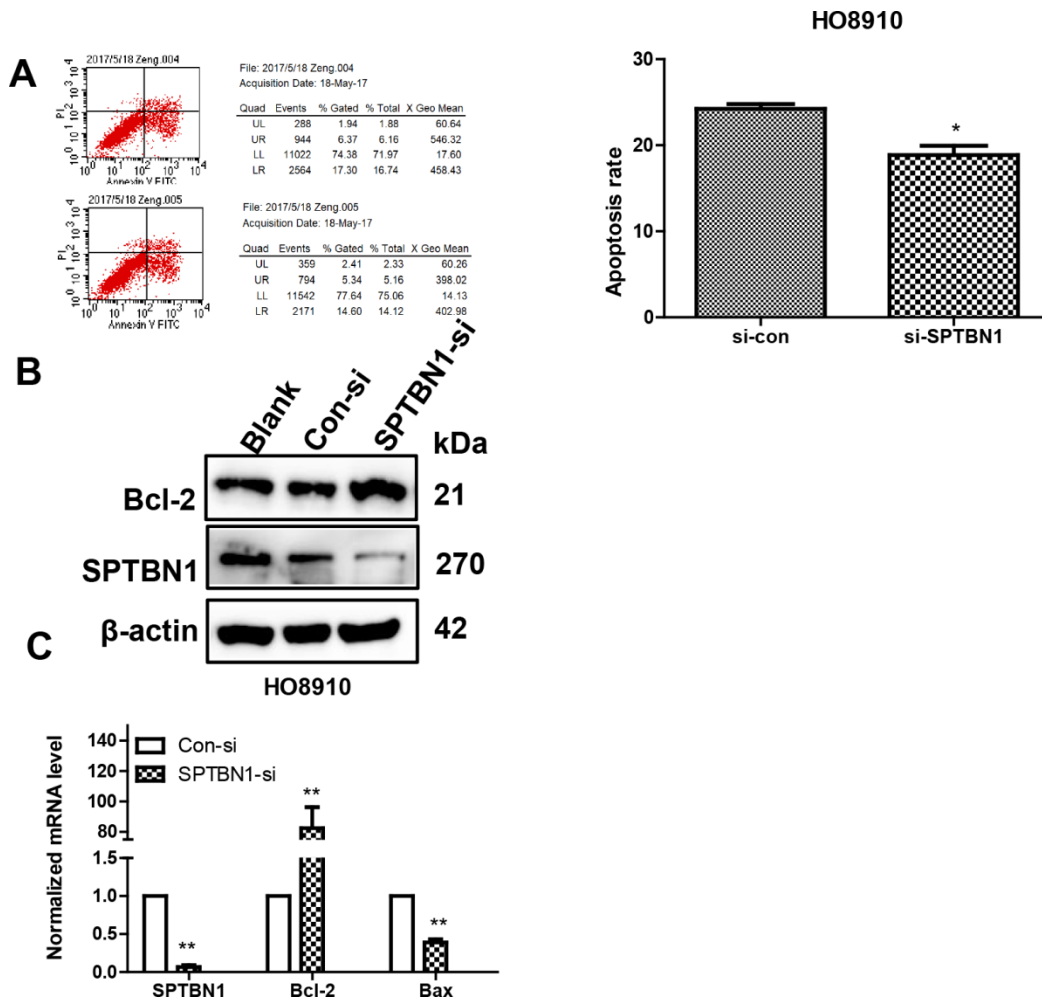

**Supplementary Figure 1.** (A) Apoptosis assay by FCM. SPTBN1 siRNA inhibited the apoptosis of HO8910 cells. (B, C) Expression of apoptosis-related genes was assessed by western blot and qPCR. In HO8910 cells without SPTBN1 expression, the expression of the apoptosis-promoting gene Bax was decreased, while Bcl-2, which inhibits apoptosis, was increased at the protein (B) and mRNA (C) levels. \*\* $P < 0.01$  vs Con-si,  $n = 3$ .

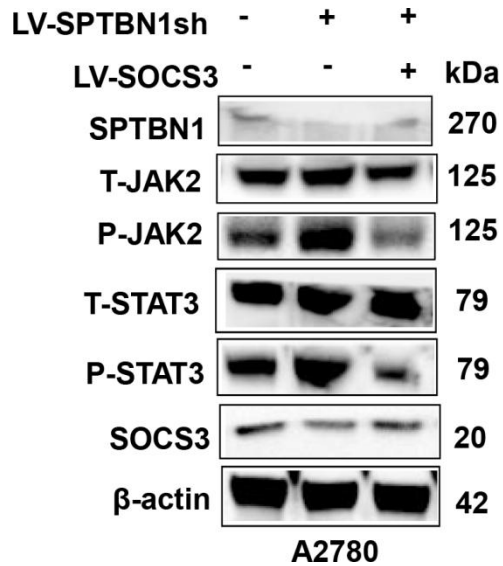

Supplementary Figure 2. Assessments of proteins associated with the JAK/STAT signaling pathway by western blot after SPTBN1 knockdown cooperated with SOCS3 overexpression in A2780 cells.

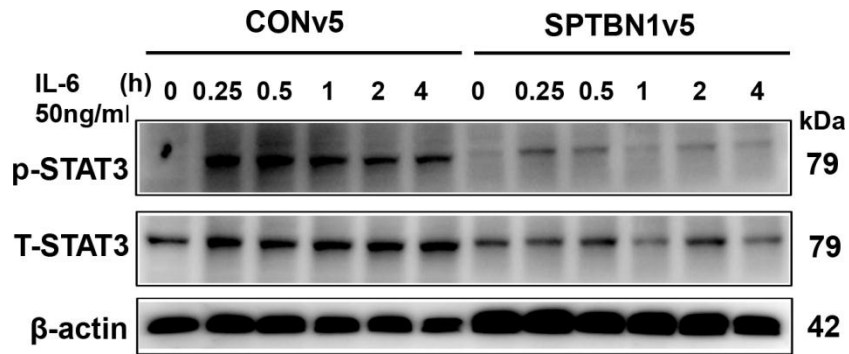

Supplementary Figure 3. IL-6, an activating cytokine, was used to determine STAT3 activation at different time points in HO8910 cells after SPTBN1 overexpression.
